# Supplementary material for: Variations in Canine Behavioural Characteristics across Conventional Breed Clusters and Most Common Breed-Based Public Stereotypes
Source: MDPI journal article supplement (doi:10.3390/ani14182695), 2024-09-17
Supplement: s1 [file Table S1 Regulations governing breeding conditions for selected breeds in chosen European countries.pdf › Table S1 Regulations governing breeding conditions for selected breeds in chosen European countries.pdf]

**Table S1:** Regulations governing breeding conditions for selected breeds in chosen European countries.

|                                      | <b>Dog breed</b>               | <b>European country</b> <sup>status</sup>                                                                                                                                                                                                                                                                                                                                                                         |
|--------------------------------------|--------------------------------|-------------------------------------------------------------------------------------------------------------------------------------------------------------------------------------------------------------------------------------------------------------------------------------------------------------------------------------------------------------------------------------------------------------------|
|                                      |                                |                                                                                                                                                                                                                                                                                                                                                                                                                   |
| <b>Potentially aggressive breeds</b> | English Bull terrier           | Austria <sup>1</sup> (Vienna, Lower Austria, Vorarlberg), Cyprus <sup>2</sup> , Denmark <sup>1</sup> , Germany <sup>2</sup> , Ireland <sup>1</sup> , Iceland <sup>2</sup> , Norway <sup>1</sup> , Spain <sup>1</sup> , Switzerland <sup>1</sup> (varies by canton), Ukraine <sup>1</sup>                                                                                                                          |
|                                      | Staffordshire Bull terrier     | Austria <sup>1</sup> (Vienna, Lower Austria, Vorarlberg), Denmark <sup>1</sup> , France <sup>1</sup> , Germany <sup>2</sup> , Iceland <sup>2</sup> , Ireland <sup>1</sup> , Lithuania <sup>1</sup> , Portugal <sup>1</sup> , Romania <sup>1</sup> , Spain <sup>1</sup> , Switzerland <sup>2</sup> , Ukraine <sup>1</sup>                                                                                          |
|                                      | Dogue de Bordeaux              | Austria <sup>1</sup> (Vorarlberg), Denmark <sup>1</sup> , Germany <sup>1</sup> (Baden-Württemberg, Bavaria, Brandenburg, Hamburg), Switzerland <sup>1</sup> (varies by canton), Ukraine <sup>1</sup> (before November 10, 2021)                                                                                                                                                                                   |
|                                      | Dobermann                      | Germany <sup>1</sup> (Brandenburg), Ireland <sup>1</sup> , Romania <sup>1</sup> , Spain <sup>1</sup> (Valencia), Switzerland <sup>1</sup> (varies by canton), Ukraine <sup>1</sup>                                                                                                                                                                                                                                |
|                                      | Rhodesian Ridgeback            | Austria <sup>1</sup> (Vorarlberg), Ireland <sup>1</sup> , Ukraine <sup>1</sup>                                                                                                                                                                                                                                                                                                                                    |
|                                      | Rottweiler                     | Austria <sup>1</sup> (Vienna, Lower Austria), France <sup>1</sup> , Germany <sup>1</sup> (Bavaria, Brandenburg, Hamburg, Hesse), Ireland <sup>1</sup> , Poland <sup>2</sup> , Portugal <sup>1</sup> , Romania <sup>1</sup> , Spain <sup>1</sup> , Switzerland <sup>1</sup> (varies by canton), Ukraine <sup>1</sup>                                                                                               |
|                                      | Bullmastiff                    | Austria <sup>1</sup> (Vienna, Vorarlberg), Denmark <sup>1</sup> , Germany <sup>1</sup> (Baden-Württemberg, Bavaria, Brandenburg, Hamburg, Hesse), Ireland <sup>1</sup> , Romania <sup>1</sup> , Spain <sup>1</sup> (Valencia), Switzerland <sup>1</sup> (varies by canton), Ukraine <sup>1</sup>                                                                                                                  |
|                                      | Fila Brasileiro                | Austria <sup>1</sup> (Vienna, Vorarlberg), Cyprus <sup>2</sup> , Denmark <sup>2</sup> , Germany <sup>1</sup> (Baden-Württemberg, Bavaria, Brandenburg, Hamburg), Iceland <sup>2</sup> , Lithuania <sup>1</sup> , Norway <sup>2</sup> , Portugal <sup>1</sup> , Romania <sup>1</sup> , Spain <sup>1</sup> , Switzerland <sup>1</sup> (varies by canton), United Kingdom <sup>2</sup>                               |
|                                      | Perro de Presa Mallorquin      | Germany <sup>1</sup> (Bavaria, Brandenburg), Poland <sup>2</sup>                                                                                                                                                                                                                                                                                                                                                  |
|                                      | Akita Inu                      | Ireland <sup>1</sup> , Spain <sup>1</sup> , Ukraine <sup>1</sup>                                                                                                                                                                                                                                                                                                                                                  |
|                                      | Tosa Inu                       | Austria <sup>1</sup> (Vienna, Lower Austria, Vorarlberg), Cyprus <sup>2</sup> , Denmark <sup>2</sup> , France <sup>1</sup> , Germany <sup>2</sup> , Iceland <sup>2</sup> , Ireland <sup>1</sup> , Norway <sup>2</sup> , Poland <sup>2</sup> , Portugal <sup>1</sup> , Romania <sup>1</sup> , Spain <sup>1</sup> , Switzerland <sup>1</sup> (varies by canton), Ukraine <sup>1</sup> , United Kingdom <sup>2</sup> |
|                                      | American Staffordshire terrier | Austria <sup>1</sup> (Vienna, Lower Austria, Vorarlberg), Cyprus <sup>2</sup> , Denmark <sup>2</sup> , France <sup>1</sup> , Iceland <sup>2</sup> , Norway <sup>2</sup> , Poland <sup>2</sup> , Portugal <sup>1</sup> , Romania <sup>1</sup> , Spain <sup>1</sup> , Switzerland <sup>1</sup> (varies by canton), Ukraine <sup>1</sup> , United Kingdom <sup>2</sup>                                               |
|                                      | Dogo Argentino                 | Austria <sup>1</sup> (Vienna, Lower Austria, Vorarlberg), Cyprus <sup>2</sup> , Denmark <sup>2</sup> , Germany <sup>2</sup> , Iceland <sup>2</sup> , Lithuania <sup>1</sup> , Norway <sup>2</sup> , Poland <sup>2</sup> , Portugal <sup>1</sup> , Romania <sup>1</sup> , Spain <sup>1</sup> , Switzerland <sup>1</sup> (varies by canton), Ukraine <sup>1</sup> , United Kingdom <sup>2</sup>                     |
|                                      | Caucasian Shepherd Dog         | Denmark <sup>2</sup> , Germany <sup>1</sup> (Hamburg, Hesse), Lithuania <sup>1</sup> , Poland <sup>2</sup> , Romania <sup>1</sup> , Ukraine <sup>1</sup>                                                                                                                                                                                                                                                          |
|                                      | Central Asian Shepherd Dog     | Denmark <sup>2</sup> , Ukraine <sup>1</sup>                                                                                                                                                                                                                                                                                                                                                                       |
|                                      | Cane Corso                     | Denmark <sup>1</sup> , Germany <sup>1</sup> (Bavaria, Brandenburg), Romania <sup>1</sup> , Switzerland <sup>1</sup> (varies by canton), Ukraine <sup>1</sup>                                                                                                                                                                                                                                                      |
|                                      | Dogo Canario                   | Denmark <sup>1</sup> , Germany <sup>1</sup> (Bavaria, Brandenburg), Poland <sup>2</sup> , Romania <sup>1</sup> , Switzerland <sup>1</sup> (varies by canton), Ukraine <sup>1</sup>                                                                                                                                                                                                                                |
|                                      | Pitbull Terrier                | Austria <sup>1</sup> (Vienna), Cyprus <sup>2</sup> , Denmark <sup>2</sup> , France <sup>1</sup> , Germany <sup>2</sup> , Iceland <sup>2</sup> , Ireland <sup>1</sup> , Lithuania <sup>2</sup> , Norway <sup>2</sup> , Poland <sup>2</sup> , Portugal <sup>1</sup> , Romania <sup>2</sup> , Spain <sup>1</sup> , Switzerland <sup>1</sup> (varies by canton), United Kingdom <sup>2</sup> , Ukraine <sup>1</sup>   |
|                                      | American Bulldog               | Denmark <sup>2</sup> , Germany <sup>1</sup> (Bavaria, Hesse), Lithuania <sup>1</sup> , Poland <sup>2</sup> , Ukraine <sup>1</sup> , United Kingdom <sup>2</sup>                                                                                                                                                                                                                                                   |

\*Explanatory note: <sup>1</sup> (*restricted*) means that there are specific rules or regulations governing the ownership, breeding, or import of that particular breed within that country, these restrictions can vary widely depending on specific country, <sup>2</sup> (*banned*) means that the breed is prohibited or not allowed within a specific country, region, or locality, bans are typically put in place due to concerns about public safety, aggressive behaviour, or incidents involving specific breeds.

## Sources:

<https://www.petraveller.com.au/blog/tag/banned-breeds>

Austria: [https://www.oesterreich.gv.at/themen/reisen\\_und\\_freizeit/haustiere/1/2.html](https://www.oesterreich.gv.at/themen/reisen_und_freizeit/haustiere/1/2.html)

Cyprus: [https://www.moa.gov.cy/moa/vs/vs.nsf/vs07\\_en/F7E307422C0B1B99C22575350040DAE2?OpenDocument](https://www.moa.gov.cy/moa/vs/vs.nsf/vs07_en/F7E307422C0B1B99C22575350040DAE2?OpenDocument)

Denmark: <https://en.foedevarestyrelsen.dk/animals/animal-welfare/danish-legislation-on-dogs>

France: <https://www.petraveller.com.au/blog/banned-dog-breeds-in-france>

Germany: [https://www.zoll.de/EN/Private-individuals/Travel/Entering-Germany/Restrictions/Dangerous-dogs/provisions\\_imposed\\_by\\_individual\\_federal\\_states.html?nn=201960&faqCalledDoc=201956](https://www.zoll.de/EN/Private-individuals/Travel/Entering-Germany/Restrictions/Dangerous-dogs/provisions_imposed_by_individual_federal_states.html?nn=201960&faqCalledDoc=201956)

Iceland: <https://www.pettravel.com/immigration/Iceland.cfm>; <https://www.icelandair.com/support/special-assistance/animal-transportation/>

Ireland: <https://www.petraveller.com.au/blog/banned-breeds-in-ireland>

Lithuania: <https://www.pettravel.com/immigration/lithuania.cfm>

Norway: <https://www.pettravel.com/immigration/Norway.cfm>

Poland: <https://www.pettravel.com/immigration/poland.cfm>

Portugal: <https://www.angloinfo.com/how-to/portugal/family/pets-animals/dangerous-dogs> ;  
<https://www.dgav.pt/animais/conteudo/animais-de-companhia-2/bem-estar-animal/animais-perigosos-e-potencialmente-perigosos/treino-de-caes-perigosos-e-potencialmente-perigosos/>

Romania: <https://www.pettravel.com/immigration/Romania.cfm>

Spain: <https://www.petraveller.com.au/blog/banned-breeds-in-spain>

Switzerland: <https://www.petraveller.com.au/blog/banned-breeds-in-switzerland>

United Kingdom: <https://www.pettravel.com/immigration/UnitedKingdom.cfm>

Ukraine: <https://visitukraine.today/blog/3271/ukraine-officially-allows-taking-pets-to-shelters-under-what-conditions#what-dog-breeds-are-dangerous>
