# Supplementary material for: Variations in Canine Behavioural Characteristics across Conventional Breed Clusters and Most Common Breed-Based Public Stereotypes
Source: MDPI journal article supplement (doi:10.3390/ani14182695), 2024-09-17
Supplement: s1 [file Table S2 Dog Personality Questionnaire.pdf › Table S2 Dog Personality Questionnaire.pdf]

**Table S1: Dog Personality Questionnaire (DPQ)**

| Disagree<br>strongly<br>1                                                                                 | Disagree<br>moderately<br>2 | Disagree<br>slightly<br>3 | Neither agree<br>nor disagree<br>4 | Agree<br>slightly<br>5                                                                                               | Agree<br>moderately<br>6 | Agree<br>strongly<br>7 |
|-----------------------------------------------------------------------------------------------------------|-----------------------------|---------------------------|------------------------------------|----------------------------------------------------------------------------------------------------------------------|--------------------------|------------------------|
| 1. _____ Dog is relaxed when greeting people.                                                             |                             |                           |                                    | 19. _____ Dog is confident.                                                                                          |                          |                        |
| 2. _____ Dog behaves aggressively if disturbed or moved when resting.                                     |                             |                           |                                    | 20. _____ Dog is dominant over other dogs.                                                                           |                          |                        |
| 3. _____ Dog is aloof or indifferent towards other dogs.                                                  |                             |                           |                                    | 21. _____ Dog avoids other dogs.                                                                                     |                          |                        |
| 4. _____ Dog is destructive.                                                                              |                             |                           |                                    | 22. _____ Dog catches and kills other animals (e.g., squirrels, rabbits).                                            |                          |                        |
| 5. _____ Dog behaves aggressively toward dogs.                                                            |                             |                           |                                    | 23. _____ Dog behaves aggressively when a person (e.g., visitor, delivery person) approaches the house or yard.      |                          |                        |
| 6. _____ Dog is anxious                                                                                   |                             |                           |                                    | 24. _____ Dog is easily startled by unexpected contact with objects (e.g., tripping, brushing against a door frame). |                          |                        |
| 7. _____ Dog loves to be praised.                                                                         |                             |                           |                                    | 25. _____ Dog works at tasks (e.g., getting treats out of a Kong, shredding toys) until entirely finished.           |                          |                        |
| 8. _____ Dog responds aggressively when threatened by another dog (e.g., growled or lunged at, cornered). |                             |                           |                                    | 26. _____ Dog is very excitable around cats.                                                                         |                          |                        |
| 9. _____ Dog is bold.                                                                                     |                             |                           |                                    | 27. _____ Dog is boisterous.                                                                                         |                          |                        |
| 10. _____ Dog is lethargic                                                                                |                             |                           |                                    | 28. _____ Dog behaves fearfully during visits to the veterinarian.                                                   |                          |                        |
| 11. _____ When off leash, dog comes immediately when called.                                              |                             |                           |                                    | 29. _____ When walking on leash, dog tends to pull ahead.                                                            |                          |                        |
| 12. _____ Dog is shy.                                                                                     |                             |                           |                                    | 30. _____ Dog behaves fearfully when near crowds of people.                                                          |                          |                        |
| 13. _____ Dog behaves aggressively towards unfamiliar people.                                             |                             |                           |                                    | 31. _____ Dog enjoys playing with toys.                                                                              |                          |                        |
| 14. _____ Dog will work to obtain an object or reward (e.g., ball, treat) that is hidden.                 |                             |                           |                                    | 32. _____ Dog is easily upset when corrected, scolded, or punished.                                                  |                          |                        |
| 15. _____ Dog likes to chase squirrels, birds, or other small animals.                                    |                             |                           |                                    | 33. _____ Dog is friendly towards unfamiliar people.                                                                 |                          |                        |
| 16. _____ Dog gets bored in play quickly.                                                                 |                             |                           |                                    | 34. _____ Dog is playful with other dogs.                                                                            |                          |                        |
| 17. _____ Dog behaves aggressively when restrained or handled (e.g., groomed).                            |                             |                           |                                    | 35. _____ Dog seeks companionship from people.                                                                       |                          |                        |
| 18. _____ Dog is quick to sneak out through open doors, gates.                                            |                             |                           |                                    | 36. _____ Dog behaves submissively (e.g., rolls over, avoids eye contact, licks lips) when greeting other dogs.      |                          |                        |

| Disagree<br>strongly<br>1                                                                                                          | Disagree<br>moderately<br>2 | Disagree<br>slightly<br>3 | Neither agree<br>nor disagree<br>4 | Agree<br>slightly<br>5                                                                                              | Agree<br>moderately<br>6 | Agree<br>strongly<br>7 |
|------------------------------------------------------------------------------------------------------------------------------------|-----------------------------|---------------------------|------------------------------------|---------------------------------------------------------------------------------------------------------------------|--------------------------|------------------------|
| 37. _____ Dog is attentive to owner's actions and words.                                                                           |                             |                           |                                    | 57. _____ Dog has a tendency to attack (or attempt to attack) other dogs.                                           |                          |                        |
| 38. _____ Dog adapts easily to new situations and environments.                                                                    |                             |                           |                                    | 58. _____ Dog is quick to recover after being startled or frightened.                                               |                          |                        |
| 39. _____ Dog likes to chase bicycles, joggers, and skateboarders.                                                                 |                             |                           |                                    | 59. _____ Dog retrieves objects (e.g., balls, toys, sticks).                                                        |                          |                        |
| 40. _____ Dog is curious.                                                                                                          |                             |                           |                                    | 60. _____ Dog is friendly towards other dogs.                                                                       |                          |                        |
| 41. _____ Dog guards food or treats from other dogs.                                                                               |                             |                           |                                    | 61. _____ Dog exhibits fearful behaviors when restrained.                                                           |                          |                        |
| 42. _____ Dog is sensitive (and reactive) to pain.                                                                                 |                             |                           |                                    | 62. _____ Dog aggressively guards coveted items (e.g., stolen item, treats, food bowl).                             |                          |                        |
| 43. _____ Dog behaves aggressively in response to perceived threats from people (e.g., being cornered, having collar reached for). |                             |                           |                                    | 63. _____ Dog is affectionate.                                                                                      |                          |                        |
| 44. _____ Dog is aloof.                                                                                                            |                             |                           |                                    | 64. _____ Dog ignores commands.                                                                                     |                          |                        |
| 45. _____ Dog is slow to learn new tricks or tasks.                                                                                |                             |                           |                                    | 65. _____ Dog behaves aggressively towards cats.                                                                    |                          |                        |
| 46. _____ Dog is interested in playing tug-o-war with people or dogs.                                                              |                             |                           |                                    | 66. _____ Dog behaves fearfully when threatened by other dogs (e.g., growled or lunged at, cornered).               |                          |                        |
| 47. _____ Dog behaves fearfully towards unfamiliar people.                                                                         |                             |                           |                                    | 67. _____ Dog follows people around.                                                                                |                          |                        |
| 48. _____ Dog is very alert.                                                                                                       |                             |                           |                                    | 68. _____ Dog shows aggression when nervous or fearful.                                                             |                          |                        |
| 49. _____ Dog willingly shares toys with other dogs.                                                                               |                             |                           |                                    | 69. _____ Dog tends to be calm.                                                                                     |                          |                        |
| 50. _____ Dog is slow to respond to corrections.                                                                                   |                             |                           |                                    | 70. _____ Dog behaves fearfully towards other dogs.                                                                 |                          |                        |
| 51. _____ Dog behaves aggressively during visits to the veterinarian.                                                              |                             |                           |                                    | 71. _____ Dog is able to focus on a task in a distracting situation (e.g., loud or busy places, around other dogs). |                          |                        |
| 52. _____ Dog jumps up on (e.g., in play) and/or mounts other dogs (outside appropriate mating).                                   |                             |                           |                                    | 72. _____ Dog is very excitable around other dogs.                                                                  |                          |                        |
| 53. _____ Dog seeks constant activity.                                                                                             |                             |                           |                                    | 73. _____ Dog behaves aggressively towards children.                                                                |                          |                        |
| 54. _____ Dog behaves fearfully towards children.                                                                                  |                             |                           |                                    | 74. _____ Dog behaves fearfully when groomed (e.g., nails trimmed, brushed, bathed, ears cleaned).                  |                          |                        |
| 55. _____ Dog is very excitable when visitors arrive.                                                                              |                             |                           |                                    | 75. _____ Dog is assertive or pushy with other dogs (e.g., if in a home with other dogs, when greeting).            |                          |                        |
| 56. _____ Dog leaves food or objects alone when told to do so.                                                                     |                             |                           |                                    |                                                                                                                     |                          |                        |
