# Supplementary material for: Variations in Canine Behavioural Characteristics across Conventional Breed Clusters and Most Common Breed-Based Public Stereotypes
Source: MDPI journal article supplement (doi:10.3390/ani14182695), 2024-09-17
Supplement: s1 [file Table S3 Scoring key for Dog Personality Questionnaire (DPQ).pdf › Table S3 Scoring key for Dog Personality Questionnaire (DPQ).pdf]

**Table S3:** Scoring key for Dog Personality Questionnaire (DPQ)

| <b>Factor</b>                                |                                 |
|----------------------------------------------|---------------------------------|
| <b>Facet</b>                                 | <b>Item number on long form</b> |
| <b>Factor 1 – Fearfulness</b>                |                                 |
| Facet 1 – Fear of People                     | <b>R1, 12, 30, 47, 54</b>       |
| Facet 2 – Nonsocial Fear                     | <b>6, R19, 24, R38, R58</b>     |
| Facet 3 – Fear of Dogs                       | <b>R9, 21, 36, 66, 70</b>       |
| Facet 4 – Fear of Handling                   | <b>28, 32, 42, 61, 74</b>       |
| <b>Factor 2 – Aggression towards People</b>  |                                 |
| Facet 1 – General Aggression                 | <b>13, 23, R33, 68, 73</b>      |
| Facet 2 – Situational Aggression             | <b>2, 17, 43, 51, 62</b>        |
| <b>Factor 3 – Activity/Excitability</b>      |                                 |
| Facet 1 – Excitability                       | <b>27, 53, 55, R69, 72</b>      |
| Facet 2 – Playfulness                        | <b>R3, R16, 31, 46, 59</b>      |
| Facet 3 – Active Engagement                  | <b>R10, 14, 25, 40, 48</b>      |
| Facet 4 – Companionability                   | <b>7, 35, R44, 63, 67</b>       |
| <b>Factor 4 – Responsiveness to Training</b> |                                 |
| Facet 1 – Trainability                       | <b>37, R45, R50, R64, 71</b>    |
| Facet 2 – Controllability                    | <b>R4, 11, R18, R29, 56</b>     |
| <b>Factor 5 – Aggression towards Animals</b> |                                 |
| Facet 1 – Aggression towards Dogs            | <b>5, 8, R34, 57, R60</b>       |
| Facet 2 – Prey Drive                         | <b>15, 22, 26, 39, 65</b>       |
| Facet 3 – Dominance over Other Dogs          | <b>20, 41, R49, 52, 75</b>      |

*Explanatory note: An R in front a item indicates that the item is reverse coded. Bolded item numbers indicate items that also appear on the short form of the DPQ, though numbered differently.*
