# Supplementary material for: Variations in Canine Behavioural Characteristics across Conventional Breed Clusters and Most Common Breed-Based Public Stereotypes
Source: MDPI journal article supplement (doi:10.3390/ani14182695), 2024-09-17
Supplement: s1 [file Table S6 List of the breeds included into the category „potentially aggressive breeds “.pdf › Table S6 List of the breeds included into the category „potentially aggressive breeds “.pdf]

**Table S6:** List of the breeds included into the category „*potentially aggressive breeds*“ (n=243).

| <b>Potentially aggressive breeds</b> | <b>FCI number*</b>    | <b>FCI breed nomenclature*</b> | <b>Total number</b> |
|--------------------------------------|-----------------------|--------------------------------|---------------------|
|                                      | 11                    | English Bull Terrier           | 23                  |
|                                      | 76                    | Staffordshire Bull Terrier     | 27                  |
|                                      | 116                   | Dogue de Bordeaux              | 6                   |
|                                      | 143                   | Dobermann                      | 18                  |
|                                      | 146                   | Rhodesian ridgeback            | 17                  |
|                                      | 147                   | Rottweiler                     | 16                  |
|                                      | 157                   | Bullmastiff                    | 5                   |
|                                      | 225                   | Fila Brasileiro                | 10                  |
|                                      | 249                   | Perro de Presa Mallorquin      | 2                   |
|                                      | 255                   | Akita                          | 15                  |
|                                      | 260                   | Tosa                           | 6                   |
|                                      | 286                   | American Staffordshire Terrier | 30                  |
|                                      | 292                   | Dogo Argentino                 | 17                  |
|                                      | 328                   | Caucasian Shepherd Dog         | 3                   |
|                                      | 335                   | Central Asian Shepherd Dog     | 5                   |
|                                      | 343                   | Cane Corso                     | 17                  |
|                                      | 346                   | Dogo Canario                   | 3                   |
|                                      | non-recognized by FCI | Pitbull Terrier                | 22                  |
|                                      | non-recognized by FCI | American Bulldog               | 1                   |
|                                      |                       | <b>Total</b>                   | <b>243</b>          |

\*Explanatory note: The FCI classification (number and nomenclature) is provided in the table solely for the purpose of better orientation.
