# Supplementary material for: Variations in Canine Behavioural Characteristics across Conventional Breed Clusters and Most Common Breed-Based Public Stereotypes
Source: MDPI journal article supplement (doi:10.3390/ani14182695), 2024-09-17
Supplement: s1 [file Table S7 Pairwise comparison table for the H1a (aggression towards people).pdf › Table S7 Pairwise comparison table for the H1a (aggression towards people).pdf]

**Table S7:** Pairwise comparison table for the H1 (aggression towards people).

| Sample1-Sample2                                       | Test Statistic | Std. Error | Std. Test Statistic | Sig. | Adj. Sig. |
|-------------------------------------------------------|----------------|------------|---------------------|------|-----------|
| <b>Herding breeds-potentially aggressive breeds</b>   | -67.181        | 36.812     | -1.825              | .068 | 1.000     |
| <b>Herding breeds-hound breeds</b>                    | 121.325        | 41.376     | 2.932               | .003 | .050      |
| <b>Herding breeds-companion breeds</b>                | 146.344        | 34.345     | 4.261               | .000 | .000      |
| <b>Herding breeds-guarding breeds</b>                 | -196.366       | 37.834     | -5.190              | .000 | .000      |
| <b>Herding breeds-mix breeds</b>                      | -213.682       | 40.207     | -5.315              | .000 | .000      |
| <b>Potentially aggressive breeds-hound breeds</b>     | 54.145         | 39.094     | 1.385               | .166 | 1.000     |
| <b>Potentially aggressive breeds-companion breeds</b> | 79.164         | 31.558     | 2.508               | .012 | .182      |
| <b>Potentially aggressive breeds-guarding breeds</b>  | 129.185        | 35.324     | 3.657               | .000 | .004      |
| <b>Potentially aggressive breeds-mix breeds</b>       | 146.501        | 37.855     | 3.870               | .000 | .002      |
| <b>Hound breeds-companion breeds</b>                  | 25.019         | 36.781     | .680                | .496 | 1.000     |
| <b>Hound breeds-guarding breeds</b>                   | -75.040        | 40.058     | -1.873              | .061 | .915      |
| <b>Hound breeds-mix breeds</b>                        | -92.357        | 42.307     | -2.183              | .029 | .436      |
| <b>Companion breeds-guarding breeds</b>               | -50.022        | 32.745     | -1.528              | .127 | 1.000     |
| <b>Companion breeds-mix breeds</b>                    | -67.338        | 35.460     | -1.899              | .058 | .864      |
| <b>Guarding breeds-mix breeds</b>                     | -17.316        | 38.849     | -.0446              | .656 | 1.000     |

Each row tests the null hypothesis that the Sample 1 and Sample 2 distributions are the same. Asymptotic significances (2-sided tests) are displayed. The significance level is .05.

\*Explanatory note: If the p-value in the row with adjusted significance is less or equal to the p value selected for the test as a level of significance ( $p = 0.05$ ) means significant difference between the categories of dog breeds.
