# Supplementary material for: Variations in Canine Behavioural Characteristics across Conventional Breed Clusters and Most Common Breed-Based Public Stereotypes
Source: MDPI journal article supplement (doi:10.3390/ani14182695), 2024-09-17
Supplement: s1 [file Table S8 Pairwise comparison table for the H1b (aggression towards animals).pdf › Table S8 Pairwise comparison table for the H1b (aggression towards animals).pdf]

**Table S8:** Pairwise comparison table for the H1b (aggression towards animals).

| Sample1-Sample2                                        | Test Statistic | Std. Error | Std. Test Statistic | Sig. | Adj. Sig. |
|--------------------------------------------------------|----------------|------------|---------------------|------|-----------|
| <b>Herding breeds-companion breeds</b>                 | 129.558        | 34.400     | 3.766               | .000 | .002      |
| <b>Herding breeds- potentially aggressive breeds</b>   | -170.419       | 36.871     | -4.622              | .000 | .000      |
| <b>Herding breeds-mix breeds</b>                       | -188.732       | 40.272     | -4.686              | .000 | .000      |
| <b>Herding breeds-guarding breeds</b>                  | -230.278       | 37.895     | -6.077              | .000 | .000      |
| <b>Herding breeds-hound breeds</b>                     | 263.407        | 41.443     | 6.356               | .000 | .000      |
| <b>Companion breeds- potentially aggressive breeds</b> | -40.461        | 31.609     | -1.293              | .196 | 1.000     |
| <b>Companion breeds-mix breeds</b>                     | -59.174        | 35.517     | -1.666              | .096 | 1.000     |
| <b>Companion breeds-guarding breeds</b>                | -100.720       | 32.798     | -3.071              | .002 | .032      |
| <b>Companion breeds-hound breeds</b>                   | -133.850       | 36.840     | -3.633              | .000 | .004      |
| <b>Potentially aggressive breeds-mix breeds</b>        | 18.313         | 37.916     | .483                | .629 | 1.000     |
| <b>Potentially aggressive breeds-guarding breeds</b>   | 59.859         | 35.381     | 1.692               | .091 | 1.000     |
| <b>Potentially aggressive breeds-hound breeds</b>      | 92.988         | 39.157     | 2.375               | .018 | .263      |
| <b>Mix breeds-guarding breeds</b>                      | 41.546         | 38.912     | 1.068               | .286 | 1.000     |
| <b>Mix breeds-hound breeds</b>                         | 74.675         | 42.375     | 1.762               | .078 | 1.000     |
| <b>Guarding breeds-hound breeds</b>                    | 33.129         | 40.123     | .826                | .409 | 1.000     |

Each row tests the null hypothesis that the Sample 1 and Sample 2 distributions are the same. Asymptotic significances (2-sided tests) are displayed. The significance level is .05.

Explanatory note: If the p-value in the row with adjusted significance (Adj. Sig. = significance with Bonferroni correction to reduce the risk of errors (or false-positives)) is less or equal to the p value selected for the test as a level of significance (p = 0.05) means significant difference between the categories of dog breeds.
