# Supplementary material for: Variations in Canine Behavioural Characteristics across Conventional Breed Clusters and Most Common Breed-Based Public Stereotypes
Source: MDPI journal article supplement (doi:10.3390/ani14182695), 2024-09-17
Supplement: s1 [file Table S9 Pairwise comparison table for the H2 (fearfulness).pdf › Table S9 Pairwise comparison table for the H2 (fearfulness).pdf]

**Table S9:** Pairwise comparison table for the H2 (fearfulness).

| Sample1-Sample2                                       | Test Statistic | Std. Error | Std. Test Statistic | Sig. | Adj. Sig. |
|-------------------------------------------------------|----------------|------------|---------------------|------|-----------|
| <b>Guarding breeds-Potentially aggressive breeds</b>  | -24.095        | 35.378     | -.681               | .049 | 1.000     |
| <b>Guarding breeds-Herding breeds</b>                 | 112.844        | 37.892     | 2.978               | .003 | .044      |
| <b>Guarding breeds-Hound breeds</b>                   | 164.530        | 40.120     | 4.101               | .000 | .001      |
| <b>Guarding breeds-Companion breeds</b>               | 234.217        | 32.795     | 7.142               | .000 | .000      |
| <b>Guarding breeds-Mix breeds</b>                     | -359.902       | 38.909     | -9.250              | .000 | .000      |
| <b>Potentially aggressive breeds-Herding breeds</b>   | 88.749         | 36.869     | 2.407               | .016 | .241      |
| <b>Potentially aggressive breeds-Hound breeds</b>     | 140.435        | 39.154     | 3.587               | .000 | .005      |
| <b>Potentially aggressive breeds-Companion breeds</b> | 210.122        | 31.607     | 6.648               | .000 | .000      |
| <b>Potentially aggressive breeds -Mix breeds</b>      | 335.808        | 37.913     | 8.857               | .000 | .000      |
| <b>Herding breeds-Hound breeds</b>                    | 51.686         | 41.440     | 1.247               | .212 | 1.000     |
| <b>Herding breeds-Companion breeds</b>                | 121.373        | 34.398     | 3.529               | .000 | .006      |
| <b>Herding breeds-Mix breeds</b>                      | -247.058       | 40.269     | -6.135              | .000 | .000      |
| <b>Hound breeds-Companion breeds</b>                  | 69.686         | 36.837     | 1.892               | .059 | .878      |
| <b>Hound breeds-Mix breeds</b>                        | -195.372       | 42.372     | -4.611              | .000 | .000      |
| <b>Companion breeds-Mix breeds</b>                    | -125.686       | 35.515     | -3.539              | .000 | .006      |

Each row tests the null hypothesis that the Sample 1 and Sample 2 distributions are the same. Asymptotic significances (2-sided tests) are displayed. The significance level is .05.

\*Explanatory note: If the p-value in the row with adjusted significance is less or equal to the p value selected for the test as a level of significance (p = 0.05) means significant difference between the categories of dog breeds.
